# Supplementary material for: MiR-145-5p Inhibits the Invasion of Prostate Cancer and Induces Apoptosis by Inhibiting WIP1
Source: Hindawi journal article supplement (doi:10.1155/2021/4412705), 2021-12-02

RWPE-1

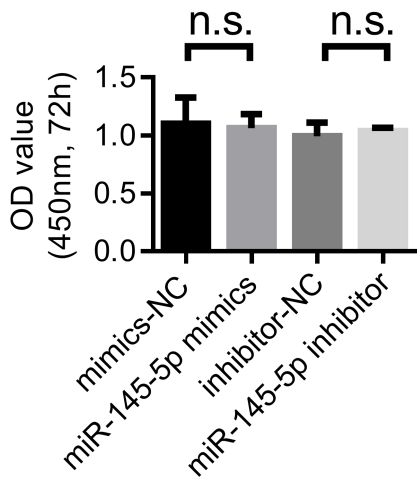

Supplement: f1 [file 4412705.f1.pdf]
